# Supplementary material for: Novel Loss-of-Function Variants in CHD2 Cause Childhood-Onset Epileptic Encephalopathy in Chinese Patients
Source: MDPI journal article supplement (doi:10.3390/genes13050908), 2022-05-19
Supplement: s1 [file s1]

**Table S1. Bioinformatic analysis of different *CHD2* variants.**

| Patient | Mutation                          | Exon<br>/Intron        | Inheritance    | Mutation<br>Taster2       | MutPredLOF                               | CADD                 | NetGene2<br>Server | NNSplice   | FATHMM-<br>Indel      | Classified according to ACMG guidelines |
|---------|-----------------------------------|------------------------|----------------|---------------------------|------------------------------------------|----------------------|--------------------|------------|-----------------------|-----------------------------------------|
| 1       | c.1809_1809+1delGGinsTT<br>(p. ?) | Exon 15 &<br>Intron 15 | <i>De novo</i> | N/A                       | N/A                                      | Pathogenic<br>(32)   | Influenced         | Influenced | N/A                   | Pathogenic<br>(PVS1+PS2+PM2)            |
| 2       | c.3455+2_3455+3insTG<br>Splice    | Intron 27              | <i>De novo</i> | N/A                       | N/A                                      | Pathogenic<br>(25.1) | Influenced         | Influenced | Pathogenic<br>(0.986) | Likely pathogenic<br>(PS2+PM2+PP3)      |
| 3       | c.3783G>A<br>p.W1261X             | Exon 30                | Maternal       | Disease<br>causing (1.00) | Possibly<br>damaging<br>(0.50<0.62<0.70) | Pathogenic<br>(40)   | N/A                | N/A        | N/A                   | Likely pathogenic<br>(PVS1+PM2)         |
