# Supplementary material for: Novel Loss-of-Function Variants in CHD2 Cause Childhood-Onset Epileptic Encephalopathy in Chinese Patients
Source: Genes (Basel). 2022 May 19;13(5):908. doi: 10.3390/genes13050908 (PMC9140428; doi:10.3390/genes13050908)
Supplement: Supplementary file 1 [file genes-13-00908-s001.zip › Supporting information Table S2.xlsx]

## Sheet: Table S2
Table S2 Clinical features of patients reported in previous literatures with CHD2 disease-causing mutations (DM) (according to HGMD)
Origin (PMID)	32238909	32238909	33176815	33176815	33584793	29314583	30868116	30525188	31487502	30660939	30185235	30945278	31914951	30776697	31677157	31677157	31677157	31677157	31677157	31677157	31677157	31677157	31677157	31677157	31677157	31677157	31677157	31677157	31677157	31677157	31677157	24834135	24834135	24834135	24834135	24932903	24932903	25672921	25672921	25672921	25672921	25672921	25672921	25672921	25672921	25672921	25672921	29740950	29740950
Proband	1	2	3	4	5	6	7	8	9	10	11	12	13	14	15	16	17	18	19	20	21	22	23	24	25	26	27	28	29	30	31	32	33	34	35	36	37	38	39	40	41	42	43	44	45	46	47	48	49
Gender	F	M	F	F	M	F	M	F	M	NK	F	M	M	M	M	F	M	F	M	M	F	F	M	F	M	F	M	M	M	M	M	F	F	F	F	M	M	F	F	F	M	M	M	M	F	M	M	F	F
Variants	c.948C>A p.Y316*	c.3454C>T p.R1152W	c.4173dupA p.Q1392Tfs*1	c.4636C>T p.R1546*	c.443+1G>A	c.901delG p.D314Mfs*32	c.1618G>A p.V540I	c.2699G>A p.R900Q	c.2779G>T p.E927*	c.3067-2A>G	c.3640G>T p.G1214*	c.3947A>G p.Y1316C	c.4003G>T p.E1335*	c.4341delT p.T1448Qfs*29	c.1778dupT T594Nfs*4	c.2410C>T p.R804*	c.2537G>A p.R846Q	c.2609G>A p.G870D	c.2644G>T p.V882F	c.2740C>T p.R914C	c.3734dupA p.Y1246Ifs*13	c.4052_4053delAA p.K1351Sfs*11	c.4156dupA p.S1386Kfs*23	c.4173dupA p.Q1392Tfs*1	c.4278+1delG	c.4636C>T p.R1546*	c.5007G>A p.W1669*	c.5120G>A p.R1707Q	c.5153+2T>C	c.5232G>A p.M1744I	c.5232G>A p.M1744I	deletion ~191 kb incl. entire gene	deletion ~210 kb incl. entire gene	deletion ~237 kb incl. entire gene & RGMA	deletion ~78 kb incl. part of gene	deletion 415 kb incl entire gene & RGMA	deletion 106 kb incl entire gene & RGMA	deletion 2.4 Mb partial gene	c.361C>T p. R121*	p.G491Vfs*13	c.1642T>C p.W548R	c.2468T>C p. L823P	c.2725C>T p.Q909*	c.4233_4236delAGAA p.E1412Gfs*64	c.4724delG p.G1575Vfs*17	c.4771_4772delCT p.L1591Dfs*32	c.4931_4932delGA p.R1644Kfs*22	c.628G>T p.E210*	c.628G>T p.E210*
Inheritance (all reported cases have occurred de novoa)	De novo	De novo	De novo	suspected de novo	De novo	De novo	NK	De novo	De novo	De novo	De novo	De novo	De novo	De novo	NK	De novo	De novo	De novo	De novo	De novo	De novo	De novo	De novo	De novo	De novo	De novo	De novo	De novo	Paternal	Paternal	Paternal	De novo	De novo	De novo	De novo	De novo	De novo	De novo	De novo	De novo	De novo	De novo	De novo	De novo	De novo	De novo	De novo	maternal	NK
Family History of Epilepsy	-	-	-	-	NK	NK	+	NK	-	+	NK	NK	-	NK	-	-	-	-	-	-	-	-	+	-	-	-	-	+	-	+	+	NK	NK	NK	NK	-	-	NK	NK	NK	NK	NK	NK	NK	NK	NK	NK	+	+
ACMG clasicification	P	LP	P	P	P	LP	LP	LP	P	P	P	P	P	P	LP	P	LP	LP	LP	LP	P	P	P	P	P	P	P	LP	LP	VUS	VUS	P	P	P	P	P	P	P	P	P	LP	LP	P	P	P	P	P	LP	LP
Onset ages (between 1 to 3 yearsa)	3y	4y	9m	2y3m	2y	6y	1y8m	Adolescence	3y6m	NK	4y2m	NK	1y7m	5y3m	1y11m	4y	1y	2y6m	1y11m	3m	2y8m	3y6m	2y	1y2m	8m	6y9m	10y5m	2y5m	2y10m	1y2m	8y	6y	3y	3m-2y	NK	2y	2y	2y8m	1y	1y	3y	2y6m	2y6m	1y	2y6m	3y6m	2y	1y1m	5y
Brain Imaging (MRI)	-	NK	Reduced T2WI and FLAIR sequence signals local area of right frontal cortex	Thick corpus callosum	-	-	NK	NK	Increased WM signal	-	-	NK	-	NK																		-	NK	-	-	-	-	-	-	-	-	5 years: limited sequences; 7 years: mild volume loss with increase in ventricular size	10 years & 11 years: atrophy markedly in the cerebellum. The corpus callosum is hypoplastic posteriorly with a small splenium	2 years and 4 years: no increase in corpus callosum size over time	12 years: generalized cerebellar atrophy with large v4 and prominent folia. The posterior corpus callosum is foreshortened and smaller posteriorly.	-	2 years: decreased occipital lobe volume and deep sulci; 7 years: marked atrophy, decreased corpus callosum size, decreased white matter volume occipitally	-
Seizure Types (patients can have multiple seizure types)			Combined	Combined																															-
-Seizuresa												+																											+	+		+	+			+	+
-Epileptic spasm																				+					+
-Status epilepticusa											+								+											+																+
-Atonic seizuresa															+				+			+		+																+		+	+					+
-Clonic seizures																																									+
-Tonic seizures					+	+							+																										+	+		+			+
-Generalized tonic seizures	+	+
-Myoclonic seizuresa									+	+			+		+				+		+	+		+	+			+	+									+	+	+	+	+	+	+	+	+	+	+
-Focal myoclonic seizures														+
-Generalized myoclonic seizures	+						+
-Focal seizures											+						+	+		+						+								+
-Focal impaired awareness seizures
-Absence seizuresa										+			+																			+	+				+		+	+				+	+
-Absence seizures (Atypical)															+					+				+				+												+						+
-Absence seizures (with Eyelid myoclonia)																																+						+					+	+	+
-Generalized seizures								+																										+														+
-Generalized myoclonic-absence seizures										+																																				+
-Generalized myoclonic-atonic seizures										+									+					+				+
-Generalized myoclonic-atonic-absence seizures																																										+		+			+
-Generalized myoclonic-clonic seizures																																																+
-Generalized tonic-clonic seizuresa		+				+			+	+	+		+			+	+	+	+			+	+				+	+	+	+	+					+	+	+	+	+	+		+	+	+	+	+	+	+
-Febrile seizuresa						+						+	+	+																														+
Fever Sensitivity of Seizer Onset	NK	NK			NK	NK	NK	NK	-	NK	NK	NK	+	+	-	+	+	+	+	-	-	-	+	-	-	-	+	-	-	+	+	NK	NK	NK		NK	NK	+	NK	NK	NK	NK	NK	NK	NK	NK	NK	NK	NK
Developmental Delay Prior to Epilepsy	NK	NK			NK	NK	NK	NK	NK	-	NK	NK	-	NK	NK	NK	NK	NK	NK	NK	NK	NK	NK	NK	NK	NK	NK	NK	NK	NK	NK	NK	NK	NK		NK	NK	Delayed Walked at 13 months, Verbal comprehension poor at 2 years	+	+	Delayed Walked 14 months, Speech delayed at 2 years	+	Walked at 12 months	+	+	+	+	+	NK
EEG/VEEG (abmormala)	Both generalised and focal epileptiform	NK			Generalized paroxysmal fast activity, generalized slow spike-and-wave	Burst of fast activity, generalized spike wave, focal spike wave	Generalized epileptic discharges, rare focal ones at the left frontopolar and left frontal regions.	NK	Spikes, spike and waves	Diffuse slowing, generalized and multifocal spikes, and one with paroxysmal fast activity.	Multifocal discharges	NK	generalized spike-wave discharges, slow background activity, with bilateral diffuse spikes and waves predominating in the frontal area.	spikes, multi-spike and slow waves	NK	NK	NK	NK	NK	NK	NK	NK	NK	NK	NK	NK	NK	NK	NK	NK	NK	NK	NK	NK		NK	Moderate degree of paroxysmal activity with frontal localization.	5 years: generalized epileptiform discharges every 1- 2 minutes	10 years: normal background for age, multifocal discharges, generalized discharges activated by sleep, paroxysmal fast activity and slow generalized polyspike wave. No photoparoxysmal response.	3 years: slow background, frequent polyphasic spike, spike slow waves; 6 years: generalized spike wave; 5 years and 13 years: diffuse slowing with multifocal and generalized slow waves; 20 years: diffuse slowing of the background, multifocal epileptiform discharges, 2Hz generalized spike wave. No photoparoxysmal response.	3 years: diffusely slow (L>R), independent bitemporal slowing, bursts of irregular spike-wave activity over both hemispheres. Not photosensitive. 12 years: fast generalized spike wave on eye closure, fragments of generalized spike wave on a normal background.	3-4 Hz generalized polyspike wave; 2.5 years: diffusely slow background, no interictal abnormalities; 4 years: frequent bifrontal spike and slow waves, particularly from sleep, background normal for age, 5 years: background normal for age, frequent bursts of 2-5Hz generalized spike wave and generalized polyspike wave with left temporal sharp waves (seen in sleep and wake), 95 seizures in 48 hours…	32 months: normal background, frontal predominant generalized spike wave, generalized polyspike wave; 5.5 years: normal background, multifocal generalized spike wave; 11 years: diffusely slow background, 3-4Hz generalized spike wave multifocal epileptiform activity with 3Hz generalized spike wave, bifrontal spikes, activated in sleep, eye closure brought out 4 5Hz posteriorly dominant generalized…	3-4 Hz generalized polyspike wave; 9 years: diffusely slow background with symmetrical theta and 3 Hz delta; 14 years: normal background for age –brief bursts of 3-4 Hz regular rhythmic generalized spike wave. No photoparoxysmal response.	3 years: slow background for age, inter-ictal generalized spike wave and generalized polyspike wave, bi frontal slow spike wave (2Hz), eye flickering – bursts of 2 Hz bifrontal spike and wave; 4 years: generalized spike wave, generalized polyspike wave; 7 years: normal background, irregular GSW with a frontal generalized spike wave predominance; 10 years; generalized spike wave on eye closure and…	4 years: diffusely slow background and generalized polyspike wave runs between 1 and 12 seconds	Generalized epileptiform activity with abrupt onset and offset lasting 2 seconds; 2 years: diffuse mildly slow background with bursts of 2-3 Hz generalized spike wave and generalized polyspike wave in wake and sleep; 4 years: background slow for age (5-6 Hz theta with admixed 3 Hz delta), bursts of generalized polyspike wave of up to 5 seconds particularly in sleep; 13 years: slow spike wave, rap…	Diffuse slowing with multifocal spikes and generalized spike and wave activity consistent with multifocal epileptic encephalopathy	NK
Photosensitivity (in some patients)a	NK	NK			NK	NK	NK	NK	NK	NK	NK	NK	+	+	NK	NK	NK	NK	NK	NK	NK	NK	+	NK	+	NK	NK	NK	NK	NK	NK	NK	+	NK		NK	NK	+	+	+	+	NK	+	+	+	NK	NK	-	NK
Treatment					+		+						+	+	+	+	+	+	+	+	+	+	+	+	+	+	+	+	+	+	+	+	+				+											+	+
-Bromide
-Clobazam					+		+															+		+																								+
-Clonazepam															+			+		+	+	+		+	+				+																			+
-Ethosuximide																																+
-Lamotrigine													+	+				+	+			+		+	+			+	+			+																+	+
-Levetiracetam															+	+	+	+	+	+	+	+	+	+	+	+	+		+	+	+		+															+
-Oxcarbazepine																				+			+		+				+
-Phenobarbital																						+							+
-Phenytoin
-Rufinamide					+																	+
-Topiramate															+		+		+	+		+			+				+
-Valproic acid					+		+						+	+	+	+	+	+	+	+	+	+	+	+	+		+	+	+	+	+		+				+											+
-Vigabatrin
-Zonisamide															+				+			+																										+
-Ketogenic diet							+								+							+		+					+
Seizure Remission (age)					Yes		No						Yes (8y)	Partially controlled	No	Yes	Yes	No	Yes	No	No	No	No	No	No	Yes	Yes	Yes	Yes	Yes	Yes	NK	NK				Yes											No	Yes
Cognitive Outcome	Mild-moderate ID	ID, ASD, met early milestones, lack of skills progression age 4, started losing acquired skills age 6	Severe ID, ASD, global developmental delay, developmental regression	Suspected ASD, developmental regression, poor motor coordination	Developmental delay		Global developmental delay	Moderate ID	Global developmental delay	ID, ASD, developmental delay	Developmental delay	Global developmental delay, motor deterioration, delayed speech and language development			ASD, developmental delay	Developmental delay	ASD, developmental delay	ASD, developmental delay	Developmental delay	Developmental delay	Developmental delay	Developmental delay	Developmental delay	ASD, developmental delay	ASD, developmental delay	ASD, developmental delay	ASD, developmental delay	-	Developmental delay	-	-	Motor delay, speech delay, learning disability, short-term memory problems, short attention span, aggressive behavior, limited social skills,	ADHD, receptive and expressive language difficulties, learning disability, short-term memory problems, limited social skills	ID, ASD, aggressive behaviour,	ID, aggressive, impulsive, repetitive behaviours	Global developmental delay, moderate ID, aggressive disorder, depression, anxious disorder, Growth retardation	Global developmental delay, moderate ID, temper tantrums, aggressive behavior	Mild ID, autistic traits, regression, aggression behavior, delayed Walked at 13 months, verbal comprehension poor at 2 years	Severe ID, regression, aggression behavior, delayed walked at 10 months, limited speech development after 12 months	Severe ID, regression, delayed walked at 12 months, no words at 2 years	Mild ID, aggression in childhood, florid psychosis at 19, delayed walked 14 months, speech delayed at 2 years	Severe ID, ASD, regression, aggression behavior, delayed walked at 18 months, single words at 2.5 years	Mild ID, ADHD, aggression behavior, walked at 12 months, late regression at 9 years from normal intellect	Moderate-severe ID, ASD, regression, aggression behavior, delayed walked at 10 months, Single words only at 7 years	Moderate-severe ID, ASD, ADHD, aggression behavior, delayed walked at 12 months, only single words at 7 years	Moderate-severe ID, ASD, ADHD, regression, aggression behavior	Severe ID, regression, obsessions, delayed walked at 18 months, limited speech development after 12 months	Global developmental delay, ID, ADHD	Bipolar disorder, ADHD, language delay and dyslexia
Development (Psychomotor & Cognition)						NK								NK														-		-	-
-ID (Mental retardationa)	+	+	+					+		+																								+	+	+	+	+	+	+	+	+	+	+	+	+	+	+
-Delayed psychomotor developmenta		+	+		+		+		+	+	+	+			+	+	+	+	+	+	+	+	+	+	+	+	+		+			+	+			+	+	+	+	+	+	+	+	+	+		+	+	+
-Psychomotor regressiona		+	+	+								+																								+		+	+	+	+	+	+	+		+	+
Behaviour
-ASD (rare)a		+	+	+						+					+		+	+						+	+	+	+							+				+				+		+	+	+
-ADHD																																	+										+		+	+		+	+
-Aggressive behavior																																+		+	+	+	+	+	+			+	+	+	+	+			+
-Psychotic features													+																						+	+					+						+
-Bruxism
-Stereotypic movements																																			+
-Limited social skills																																+	+
-Short attention span																																+
Dysmorphic features			Microcephalus																													Square-shaped face, high forehead, prominent columella, short philtrum, fifth-finger brachydactyly, syndactyly of toes 2 and 3	Triangular face, prominent forehead, full lips, widely spaced central maxillary incisors, micrognathia,		Brachycephaly, broad forehead, short nose, upturned tip	Upslanting palpebral fissures, long eyelashes, hypoplastic alae nasi, short philtrum, bilateral astigmatism, myopia, bilateral astigmatism, myopia, narrow feet	Upslanting palpebral fissures, large ear lobes, bulbous nasal tip, low posterior hairline, small hands, tapering fingers, small feet, broad laterally deviated toes											microcephaly
Other	Myocoloic astatic phenotype			Visual impairment																												Mild hypotonia, mild thoracic scoliosis, proximal interphalangeal joint fusion of thumbs, mild peripheral hearing loss (higher frequencies) duplex kidney,	mild hypotonia, feeding difficulties, reduced body fat mass, visual perceptual disability,	Tourette’s syndrome, mild thoracic scoliosis	mild hypotonia, feeding difficulties, strabismus	Truncal obesity since puberty, severe kyphoscoliosis needing surgery at 18 years	Truncal obesity since puberty, mild to moderate scoliosis, , cryptorchidism	Mild crouch gait	Short stature, stooped gait, poor coordination and balance.	Needs guidance to walk		Crouch gait	Short stature, mild crouch gait, ataxia	Crouch gait, transient ataxia on valproate	Short stature	Mild ataxia	Short stature, crouch gait, transient ataxia on valproate	Mild Chiari I malformation	infantile meningitis,
aFeatures derived from the OMIM (https://www.omim.org/entry/615369).
Key: M = male, F = female, m = month, y = year, P = pathogenic, LP = likely pathogenic, NK=Not known, EEG = electroencephalography, VEEG = video , MRI = , PPR = photoparoxysmal response, ID = , ASD=autism spectrum disorder, ADHD=attention deficit hyperactivity disorder, KD = ketogenic diet.
[truncated: 16 more columns]
